# Supplementary material for: A quaternary-ammonium-functionalized covalent organic framework for anion conduction
Source: Royal Society of Chemistry journal article supplement (doi:10.1039/c7ce00042a), 2017-01-01
Supplement: c7ce00042a1.pdf [file c7ce00042a1.pdf]

*Supporting Information for CrystEngComm.*

## **A Quaternary-Ammonium-Functionalized Covalent Organic Framework for Anion Conduction**

Hongxia Guo,<sup>†,‡</sup> Junhua Wang,<sup>‡</sup> Qianrong Fang,<sup>‡,§</sup> Yun Zhao,<sup>‡</sup> Shuang Gu,<sup>‡</sup> Jie Zheng,<sup>‡</sup> Yushan Yan<sup>‡\*</sup>

<sup>†</sup> College of Materials Science and Engineering, Beijing University of Technology, Beijing 100124, P. R. China

<sup>‡</sup> Department of Chemical and Biomolecular Engineering, Center for Catalytic Science and Technology, University of Delaware, Newark, Delaware 19716, United States

<sup>§</sup> State Key Laboratory of Inorganic Synthesis and Preparative Chemistry, Jilin University, Changchun 130012, P. R. China

**\* Corresponding author:**

Prof. Dr. Yushan Yan

Department of Chemical and Biomolecular Engineering, Center for Catalytic Science and Technology, University of Delaware,  
Newark, Delaware 19716, United States

E-mail: yanys@udel.edu (Y. Yan)

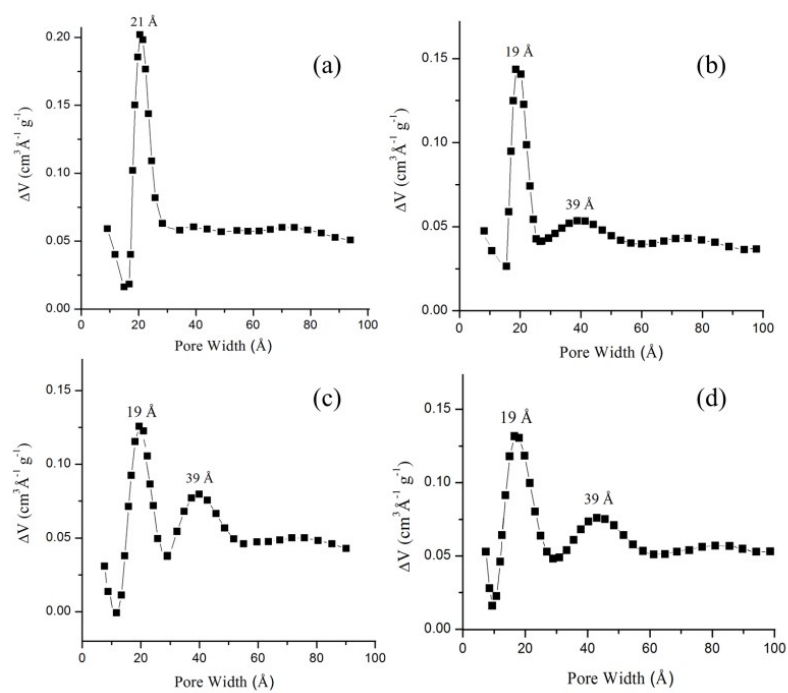

Figure SI 1. Pore size distributions of (a) TpBD-Me, (b) TpBD-MeBr, (c) TpBD-MeQA<sup>+</sup>Br<sup>-</sup>, and (d) TpBD-MeQA<sup>+</sup>OH<sup>-</sup>.

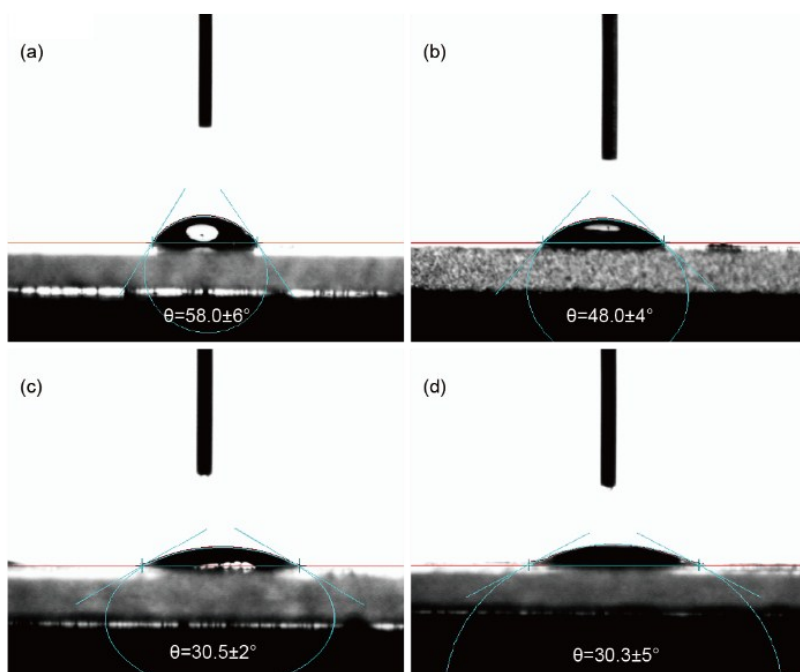

Figure SI 2. Water contact angle of (a) TpBD-Me, (b) TpBD-MeBr, (c) TpBD-MeQA<sup>+</sup>Br<sup>-</sup>, and (d) TpBD-MeQA<sup>+</sup>OH<sup>-</sup>.
